# Supplementary material for: A visible light driven 3D hierarchical CoTiO3/BiOBr direct Z-scheme heterostructure with enhanced photocatalytic degradation performance
Source: Royal Society of Chemistry journal article supplement (doi:10.1039/d1nj04252a), 2021-11-17
Supplement: d1nj04252a1.pdf [file d1nj04252a1.pdf]

Electronic Supplementary Material (ESI) for New Journal of Chemistry.  
This journal is © The Royal Society of Chemistry and the Centre National de la Recherche Scientifique 2021

## Supporting information

### **Visible light driven 3D hierarchical CoTiO<sub>3</sub>/BiOBr direct Z-scheme heterostructure with enhanced photocatalytic degradation performance**

Lijie Wang,<sup>a,b</sup> Qiang Li,<sup>a,b,\*</sup> Xiaoxiao Lu,<sup>a,b</sup> Zhenfei Tian,<sup>a,b</sup> Shiwu He<sup>a,b</sup> and Jinfeng Zhang<sup>a,b</sup>

<sup>a</sup>*College of Physics and Electronic Information, Huaibei Normal University, Huaibei, 235000, P.R. China*

<sup>b</sup>*Anhui Province Key Laboratory of Pollutant Sensitive Materials and Environmental Remediation, Huaibei Normal University, Huaibei, 235000, P.R. China*

\*Corresponding authors.

E-mail address: qiangli@chnu.edu.cn (Q. Li)

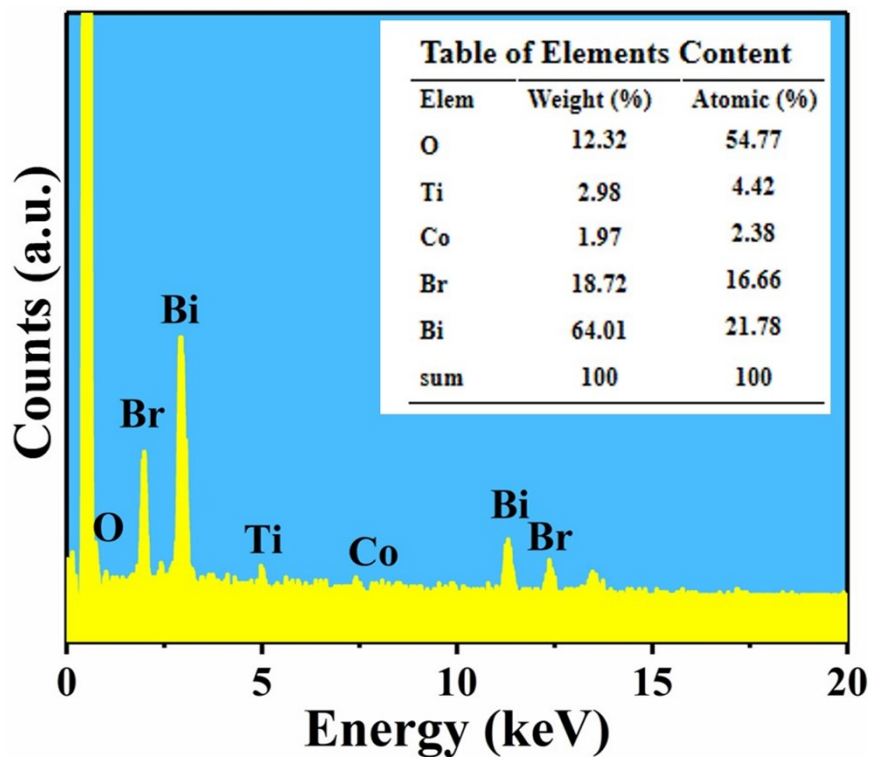

Fig. S1. EDX spectrum of CTBB-5.

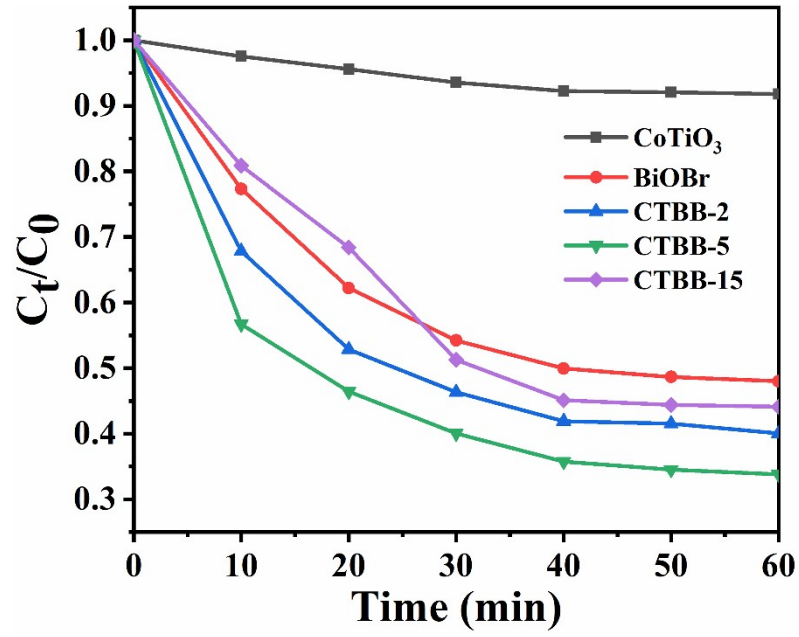

Fig. S2. Absorption ability evaluation of the as-prepared samples for RhB in dark condition.

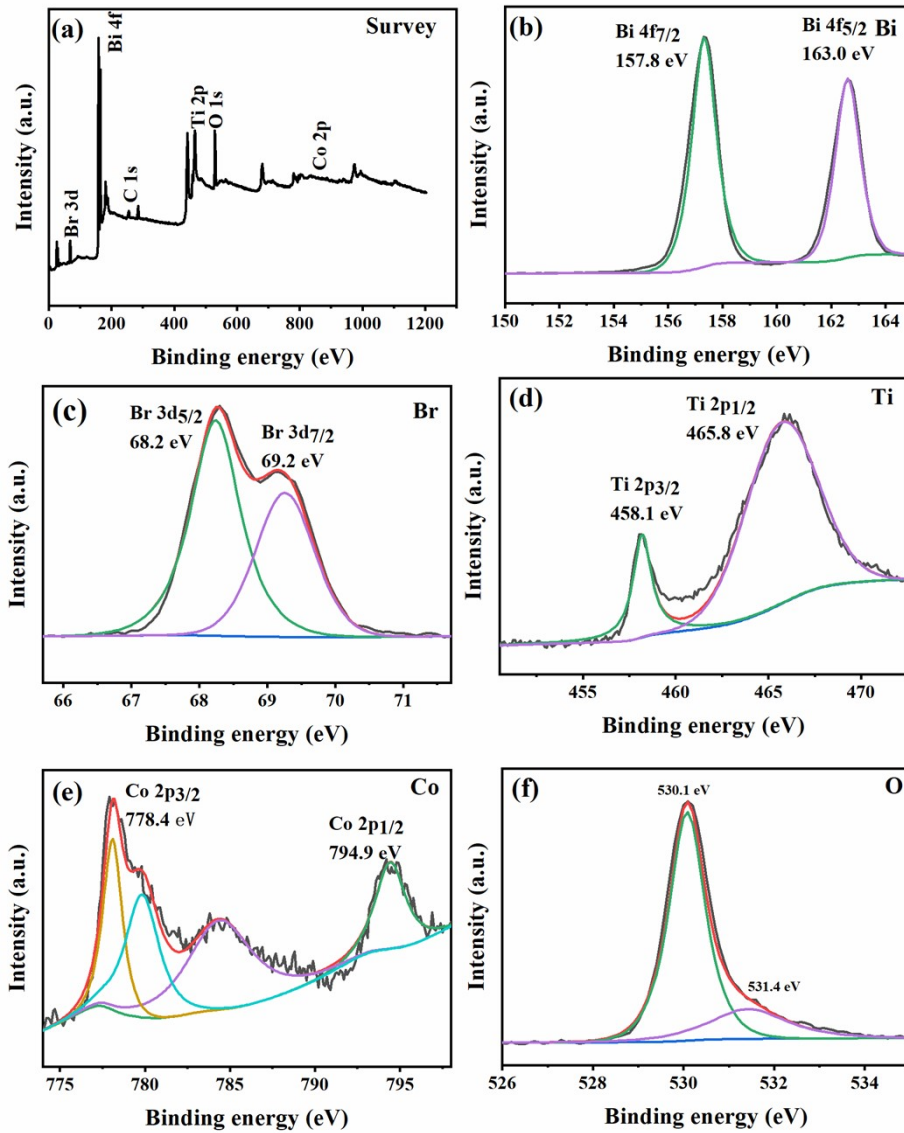

Fig. S3. XPS spectra of (b) Bi 4f, (c) Br 3d, (d) Ti 2p, (e) Co 2p and (f) O for CTBB-5 after the catalytic reaction.

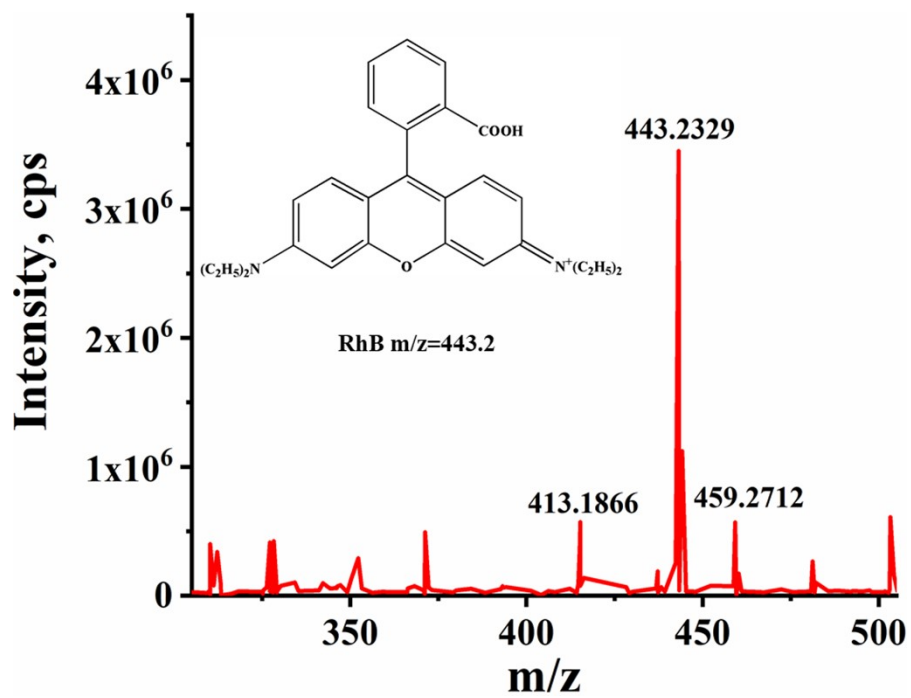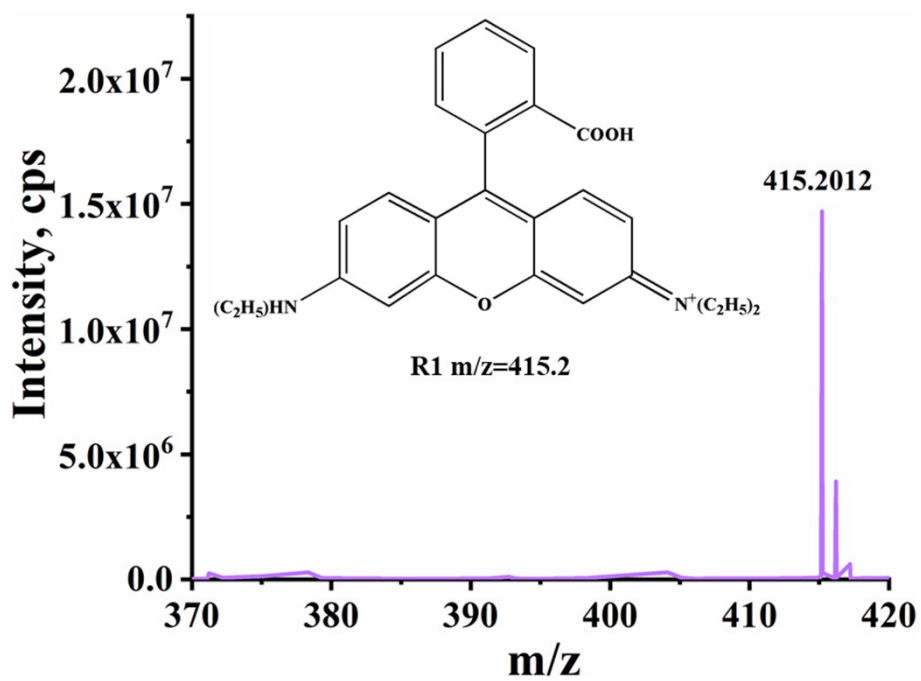

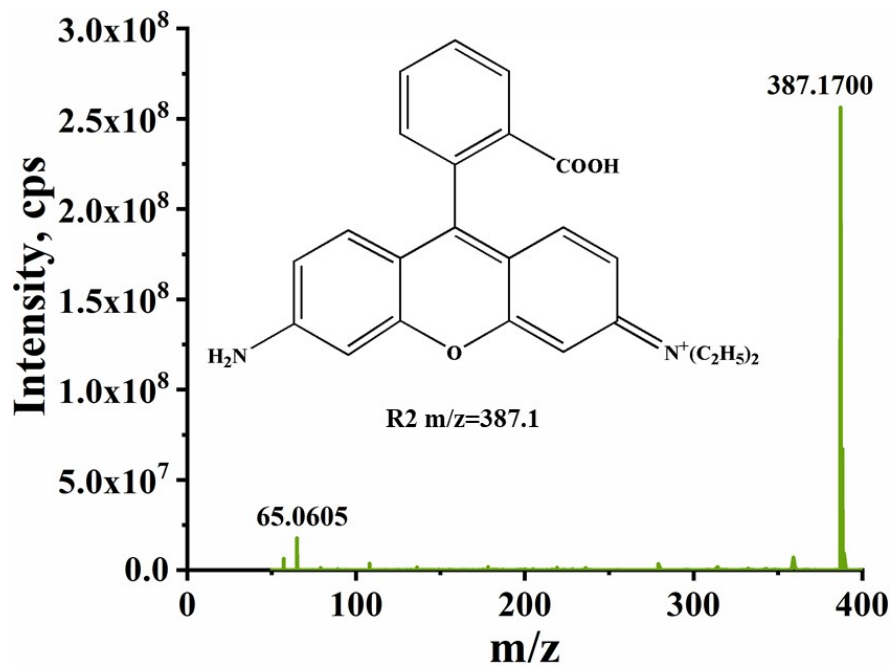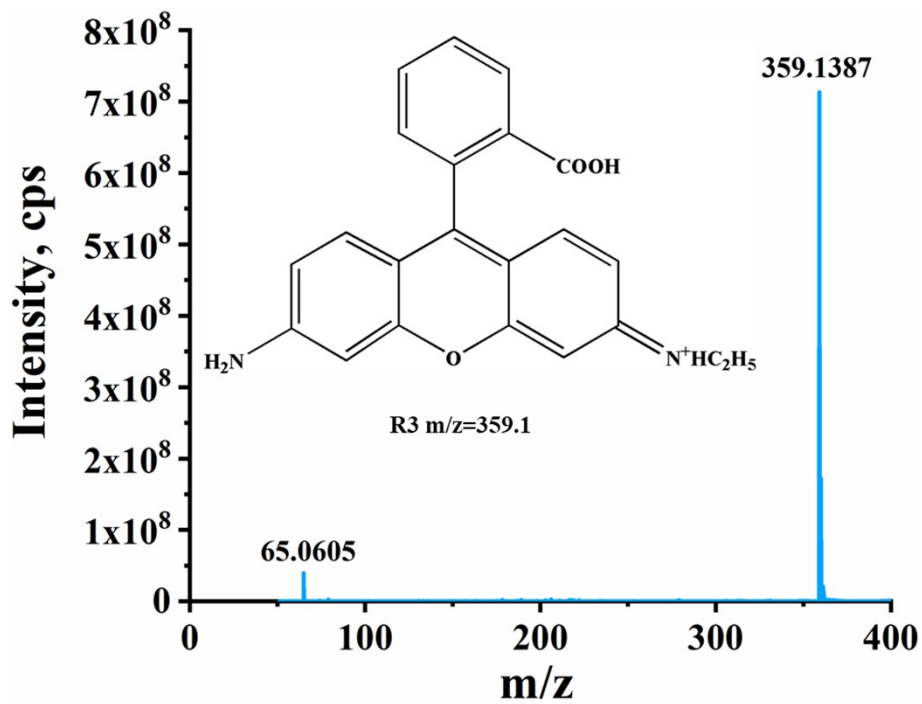

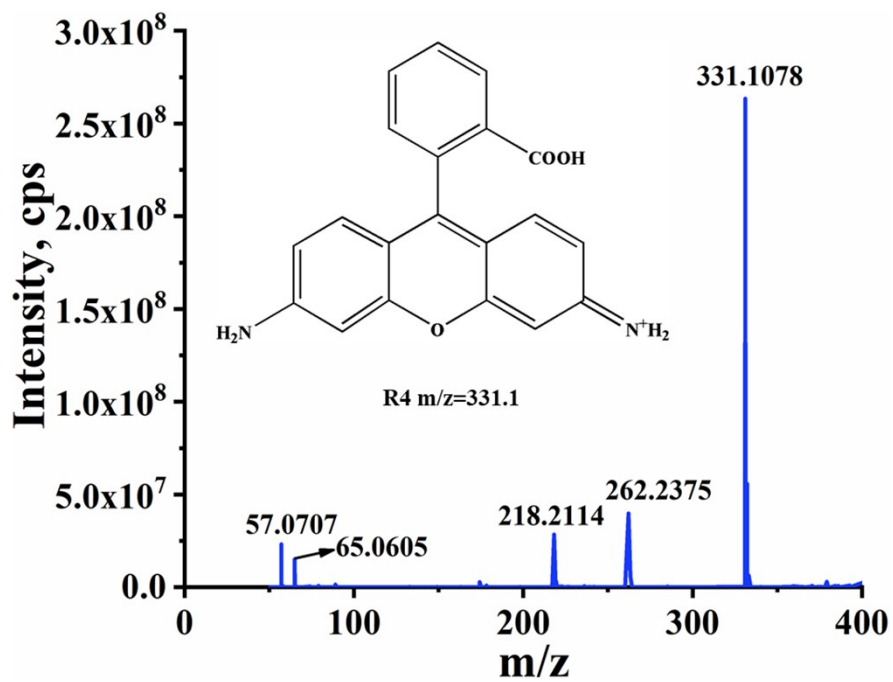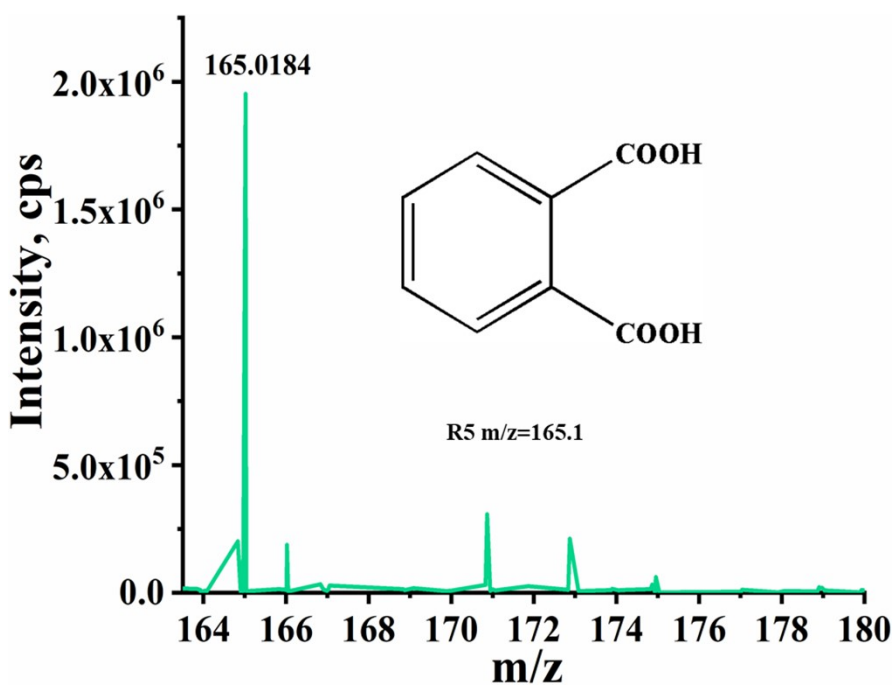

Fig. S4. Mass spectra of RhB and its transformation products.

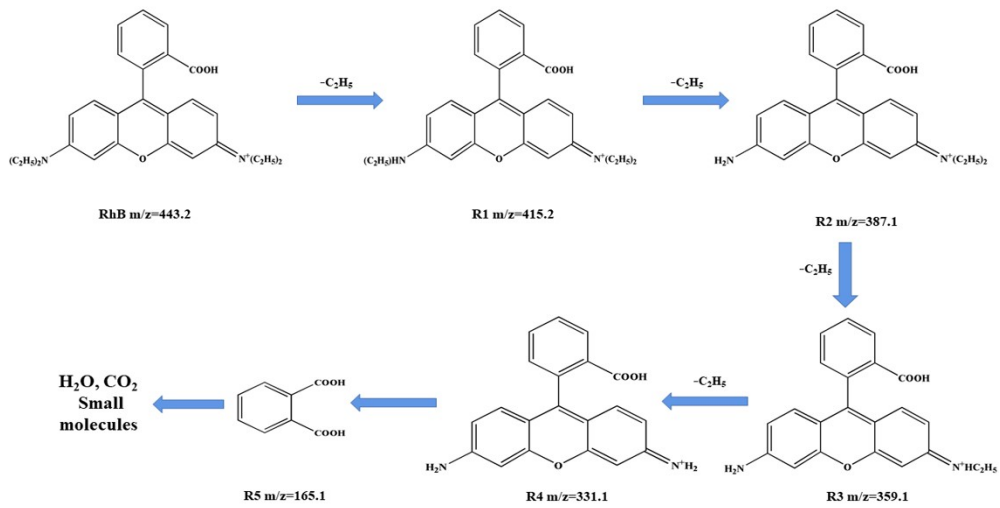

Fig. S5. Possible degradation pathway of RhB in the CoTiO<sub>3</sub>/BiOBr system.
